# Supplementary material for: Identification of variants in genes associated with autoinflammatory disorders in a cohort of patients with psoriatic arthritis
Source: PubMed Central journal article supplement — RMD Open. 2022 Sep 16;8(2):e002561. doi: 10.1136/rmdopen-2022-002561 (PMC9486391; doi:10.1136/rmdopen-2022-002561), 2022-09-16
Supplement: rmdopen-2022-002561supp001.pdf [file rmdopen-2022-002561supp001.pdf]

**Suppl. Table 1:** panel of genes tested with targeted next-generation sequencing

|                 |               |               |               |                 |                  |                |
|-----------------|---------------|---------------|---------------|-----------------|------------------|----------------|
| <i>ACPF5</i>    | <i>HAVCR2</i> | <i>LPIN2</i>  | <i>NLRP12</i> | <i>PSMB8</i>    | <i>SH3BP2</i>    | <i>TNFRSF6</i> |
| <i>ADAR1</i>    | <i>HGNC</i>   | <i>LRBA</i>   | <i>NOD2</i>   | <i>PSMB9</i>    | <i>SLC29A3</i>   | <i>TNFRSF9</i> |
| <i>AP1S3</i>    | <i>IFIH1</i>  | <i>MEFV</i>   | <i>OAS1</i>   | <i>PSMG2</i>    | <i>SOCS1</i>     | <i>TNFSF6</i>  |
| <i>CARD14</i>   | <i>IKKBK</i>  | <i>MVK</i>    | <i>PI3KCD</i> | <i>PSTPIP1</i>  | <i>STAT1</i>     | <i>TREX1</i>   |
| <i>CECR1</i>    | <i>IL10</i>   | <i>NALP3</i>  | <i>PIK3R1</i> | <i>PTEN</i>     | <i>STAT3</i>     | <i>TRIM22</i>  |
| <i>COPA</i>     | <i>IL10RA</i> | <i>NEMO</i>   | <i>PLCG2</i>  | <i>RAG1</i>     | <i>STING</i>     | <i>TYK2</i>    |
| <i>CTLA4</i>    | <i>IL10RB</i> | <i>NFKB1</i>  | <i>POLA1</i>  | <i>RNASEH2A</i> | <i>TMEM173</i>   | <i>USP18</i>   |
| <i>DDX58</i>    | <i>IL1RN</i>  | <i>NFKBIA</i> | <i>PSMA3</i>  | <i>RNASEH2B</i> | <i>TNFAIP3</i>   |                |
| <i>DNASE1L3</i> | <i>IL36RN</i> | <i>NLR4</i>   | <i>PSMB4</i>  | <i>RNASEH2C</i> | <i>TNFRSF11A</i> |                |
| <i>DNASE2</i>   | <i>LIG4</i>   | <i>NLRP1</i>  | <i>PSMB8</i>  | <i>SAMHD1</i>   | <i>TNFRSF1A</i>  |                |

**Suppl. Table 2:** Characteristics of psoriatic arthritis in patients with and without variants in *AP1S3*

| Characteristic                     | at least one variant in <i>AP1S3</i> (N=5) | no variant in <i>AP1S3</i> (N=115) | OR (95% CI)       | <i>p</i> *    |
|------------------------------------|--------------------------------------------|------------------------------------|-------------------|---------------|
| Psoriasis – no (%)                 | 5 (100)                                    | 91 (79.13)                         | 2.94 (0.16-55.15) | 0.2534        |
| Pustular psoriasis – no (%)        | 4 (80)                                     | 10 (8.7)                           | 42 (4.27-413)     | <0.0001 (***) |
| Nail psoriasis – no (%)            | 0 (0)                                      | 9 (7.83)                           | 1.02 (0.05-19.88) | 0.5154        |
| Oligoarthritis – no (%)            | 2 (40)                                     | 29 (25.22)                         | 1.98 (0.31-12.43) | 0.4597        |
| Polyarthritis – no (%)             | 2 (40)                                     | 52 (45.22)                         | 0.81 (0.13-5.02)  | 0.8184        |
| Axial SpA – no (%)                 | 1 (20)                                     | 34 (29.57)                         | 0.6 (0.06-5.53)   | 0.645         |
| Enthesitis – no (%)                | 1 (20)                                     | 34 (29.57)                         | 0.6 (0.06-5.53)   | 0.645         |
| Anterior uveitis – no (%)          | 0 (0)                                      | 6 (5.2)                            | 1.53 (0.08-30.82) | 0.6003        |
| IBD – no (%)                       | 0 (0)                                      | 5 (4.35)                           | 1.83 (0.09-37.42) | 0.6339        |
| Dactylitis – no (%)                | 0 (0)                                      | 11 (9.57)                          | 0.83 (0.04-15.93) | 0.4681        |
| Other autoimmune disorder – no (%) | 2 (40)                                     | 34 (29.57)                         | 1.59 (0.25-9.94)  | 0.618         |

CI, confidence interval; IBD, inflammatory bowel disease; N, total number; no, number; OR, odds ratio; SpA, spondyloarthritis  
\**p* < 0.001 \*\*\*

**Suppl. Table 3:** Characteristics of psoriatic arthritis in patients with and without variants in *PLCG2*

| Characteristic                     | at least one variant in <i>PLCG2</i> (N=4) | no variant in <i>PLCG2</i> (N=116) | OR (95% CI)       | <i>p</i> |
|------------------------------------|--------------------------------------------|------------------------------------|-------------------|----------|
| Psoriasis – no (%)                 | 3 (75)                                     | 93 (80.17)                         | 0.74 (0.07-7.47)  | 1        |
| Pustular psoriasis – no (%)        | 0 (0)                                      | 14 (12.07)                         | 0.79 (0.04-15.37) | 1        |
| Nail psoriasis – no (%)            | 0 (0)                                      | 9 (7.75)                           | 1.23 (0.06-25.17) | 1        |
| Oligoarthritis – no (%)            | 2 (50)                                     | 29 (25)                            | 3 (0.4-22.28)     | 0.2742   |
| Polyarthritis – no (%)             | 1 (25)                                     | 53 (45.69)                         | 0.4 (0.04-3.92)   | 0.6263   |
| Axial SpA – no (%)                 | 1 (25)                                     | 33 (28.45)                         | 0.8 (0.08-8)      | 1        |
| Enthesitis – no (%)                | 1 (25)                                     | 33 (28.45)                         | 0.8 (0.08-8)      | 1        |
| Anterior uveitis – no (%)          | 0 (0)                                      | 6 (5.17)                           | 1.89 (0.09-39)    | 1        |
| IBD – no (%)                       | 1 (25)                                     | 3 (2.59)                           | 9.33 (0.79-110.8) | 0.1584   |
| Dactylitis – no (%)                | 0 (0)                                      | 11 (9.48)                          | 1.02 (0.05-20.17) | 1        |
| Other autoimmune disorder – no (%) | 1 (25)                                     | 34 (29.3)                          | 0.77 (0.08-7.68)  | 1        |

CI, confidence interval; IBD, inflammatory bowel disease; N, total number; no, number; OR, odds ratio; SpA, spondyloarthritis

**Suppl. Table 4:** Characteristics of psoriatic arthritis in patients with and without variants in *NOD2*

| Characteristic | at least one variant in <i>NOD2</i> (N=3) | no variant in <i>NOD2</i> (N=117) | OR (95% CI) | <i>p</i> * |
|----------------|-------------------------------------------|-----------------------------------|-------------|------------|
|----------------|-------------------------------------------|-----------------------------------|-------------|------------|

|                                    |           |            |                   |             |
|------------------------------------|-----------|------------|-------------------|-------------|
| Psoriasis – no (%)                 | 3 (100)   | 93         | 1.83 (0.09-36.74) | 1           |
| Pustular psoriasis – no (%)        | 0 (0)     | 14 (11.97) | 1.02 (0.05-20.78) | 1           |
| Nail psoriasis – no (%)            | 0 (0)     | 9 (7.69)   | 1.63 (0.08-34.01) | 1           |
| Oligoarthritis – no (%)            | 1 (33.33) | 30 (25.64) | 1.45 (0.13-16.58) | 1           |
| Polyarthritis – no (%)             | 2 (66.67) | 52 (44.44) | 2.5 (0.22-28.36)  | 0.5876      |
| Axial SpA – no (%)                 | 0 (0)     | 35 (29.91) | 0.33 (0.02-6.6)   | 0.5551      |
| Enthesitis – no (%)                | 0 (0)     | 35 (29.91) | 0.33 (0.02-6.6)   | 0.5551      |
| Anterior uveitis – no (%)          | 0 (0)     | 6 (5.13)   | 3.43 (0.15-79.14) | 1           |
| IBD – no (%)                       | 2 (66.67) | 3 (2.56)   | 76 (5.31-108.7)   | 0.0041 (**) |
| Dactylitis – no (%)                | 0 (0)     | 11 (9.4)   | 1.32 (0.06-27.27) | 1           |
| Other autoimmune disorder – no (%) | 1 (33.33) | 35 (29.91) | 1.22 (0.11-13.92) | 1           |

CI, confidence interval; IBD, inflammatory bowel disease; N, total number; no, number; OR, odds ratio; SpA, spondyloarthritis  
\*p < 0,01 \*\*

**Suppl. Table 5:** Treatment of psoriatic arthritis in patients with or without variants in genes associates with autosomal dominant autoinflammatory disorders at last follow-up visit

| variable                                                     | at least one variant in an AD-AID/IEI-associated gene (N=20) | no variant an AD-AID/IEI-associated gene (N=100) | OR (95% CI)       | p <sup>+</sup> |
|--------------------------------------------------------------|--------------------------------------------------------------|--------------------------------------------------|-------------------|----------------|
| NSAID-based – no (%)                                         | 2 (10)                                                       | 10 (10)                                          | 1 (0.2-4.96)      | 1              |
| csDMARDs-based – no (%)                                      | 8 (40)                                                       | 33 (33)                                          | 1.35 (0.5-3.63)   | 0.6087         |
| TNFi-based – no (%)                                          | 5 (25)                                                       | 22 (22)                                          | 1.18 (0.39-3.61)  | 0.7732         |
| IL-17i-based – no (%)                                        | 3 (15)                                                       | 16 (16)                                          | 0.93 (0.24-3.53)  | 1              |
| JAKi-based – no (%)                                          | 2 (10)                                                       | 8 (8)                                            | 1.28 (0.25-6.52)  | 0.6722         |
| IL-12/23i-based – no (%)                                     | 0 (0)                                                        | 6 (6)                                            | 0.35 (0.02-6.55)  | 0.5878         |
| Other treatment – no (%)                                     | 0 (0)                                                        | 5 (5)                                            | 0.42 (0.02-7.97)  | 0.5885         |
| Treatment escalation/change due to disease activity – no (%) | 6 (30)                                                       | 13 (13)                                          | 2.87 (0.94-8.79)  | 0.0875         |
| CRP (mg/L) – median (IQR)                                    | 5.2 (1.42-25.2)                                              | 1.4 (0.7-4.12)                                   | NA                | 0.0042 (**)    |
| CRP > 5 mg/l – no (%)                                        | 10 (50)                                                      | 14 (14)                                          | 6.14 (2.16-17.43) | 0.0009 (***)   |
| CRP > 10 mg/l – no (%)                                       | 6 (30)                                                       | 9 (9)                                            | 4.33 (1.34-14.05) | 0.0191 (*)     |

BASDAI, Bath Ankylosing Spondylitis Disease Activity Index; CI, confidence interval; CRP, c reactive protein; csDMARDs, conventional synthetic disease-modifying antirheumatic drug; Disease Activity Score-28 with CRP; IL-12/23i, interleukin 12/23 inhibitor; IL-17i, interleukin 17 inhibitor; JAKi, Janus kinase inhibitor; N, total number; NA, not applicable; no, number; NSAID, non-steroidal anti-inflammatory drugs; OR, odds ratio; TNFi, tumor necrosis factor inhibitor  
\*p < 0.05 \*, p < 0,01 \*\*, p < 0.001 \*\*\*
